# Supplementary material for: A water-stable zeolite-like metal–organic framework for selective separation of organic dyes
Source: Royal Society of Chemistry journal article supplement (doi:10.1039/c3ra41627e), 2013-11-04
Supplement: c3ra41627e.pdf [file c3ra41627e.pdf]

## Supporting Information

### Water-stable Zeolite-like Metal-Organic Framework for Selective Separation of Organic Dyes

Yan-Xi Tan, Yan-Ping He, Min Wang and Jian Zhang\*

*State Key Laboratory of Structural Chemistry, Fujian Institute of Research on the  
Structure of Matter, Chinese Academy of Sciences, Fuzhou, Fujian 350002, P. R.  
China.*

E-mail: [zhj@fjirsm.ac.cn](mailto:zhj@fjirsm.ac.cn)

## Materials and Instrumentation

All reagents were purchased commercially and used without further purification. All Powder X-ray diffraction (PXRD) analyses were recorded on a Rigaku Dmax2500 diffractometer with Cu K $\alpha$  radiation ( $\lambda = 1.54056 \text{ \AA}$ ) with a step size of  $0.05^\circ$ . Thermal stability studies were carried out on a NETSCHZ STA-449C thermoanalyzer with a heating rate of  $10^\circ\text{C}/\text{min}$  under an air atmosphere. Gas adsorption measurement was performed in the ASAP (Accelerated Surface Area and Porosimetry) 2020 System. High-performance liquid chromatography (HPLC) separation experiment was performed in LC-20AD System.

**Synthesis of [AgIn(ina)<sub>4</sub>] $\cdot$ 2DMF (1):** Hina (246 mg, 2 mmol), AgNO<sub>3</sub> (85 mg, 0.5 mmol) and In(NO<sub>3</sub>)<sub>3</sub> (150 mg, 0.5 mmol) were dissolved in 5 mL DMF, which were placed in a small vial. The mixture was heated at  $100^\circ\text{C}$  for 8 hours, and then cooled to room temperature. Colorless block crystals of the product were formed and collected by filtration and washed with DMF several times (Yield: 75% based on H<sub>2</sub>ina).

**Synthesis of [CuIn(ina)<sub>4</sub>] $\cdot$ 2DMF (2):** Hina (246 mg, 2 mmol), CuI (95 mg, 0.5 mmol) and In(NO<sub>3</sub>)<sub>3</sub> (150 mg, 0.5 mmol) were dissolved in 5 mL DMF, which were placed in a small vial. The mixture was heated at  $100^\circ\text{C}$  for 3 days, and then cooled to room temperature. Red block crystals of the product were formed and collected by filtration and washed with DMF several times (Yield: 43% based on H<sub>2</sub>ina).

**X-ray diffraction analysis:** The diffraction data for compounds were collected on an Oxford Xcalibur diffractometer equipped with a graphite-monochromatized Mo-K $\alpha$  radiation ( $\lambda = 0.71073 \text{ \AA}$ ) at 293(2) K. The structures were solved by direct methods and refined on  $F^2$  by full-matrix, least-squares methods using the SHELXL-97 program package. CCDC-902245 & 902246 (**1** and **2**) contain the supplementary crystallographic data for this paper. These data can be obtained free of charge via [www.ccdc.cam.ac.uk/conts/retrieving.html](http://www.ccdc.cam.ac.uk/conts/retrieving.html).

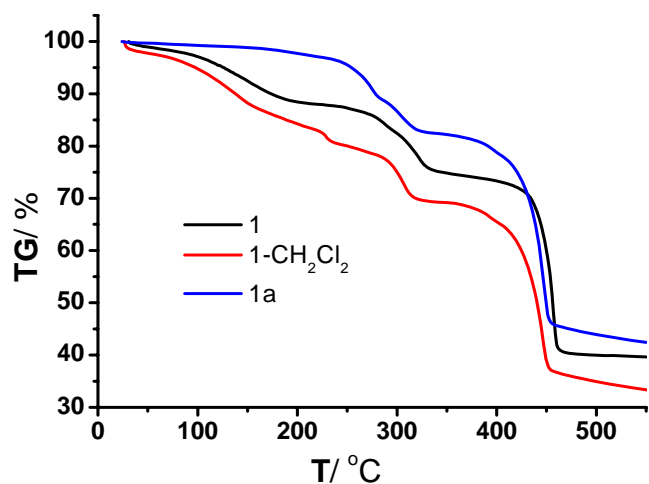

Figure S1. The TG plots of **1**, CH<sub>2</sub>Cl<sub>2</sub>-exchanged **1** and hollow phase of **1a**.

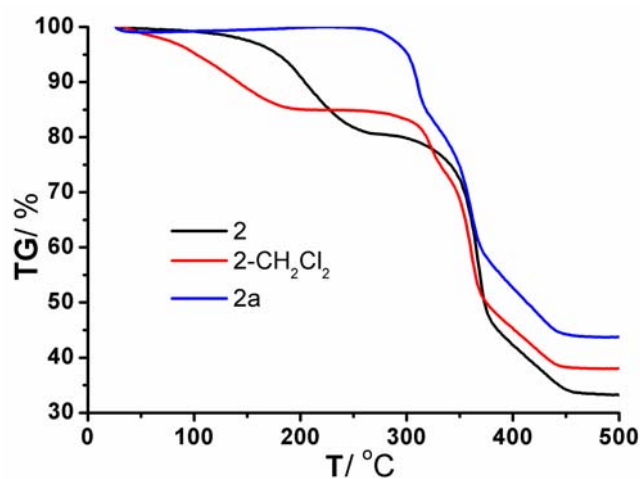

Figure S2. The TG plots of **2**, CH<sub>2</sub>Cl<sub>2</sub>-exchanged **2** and hollow phase of **2a**.

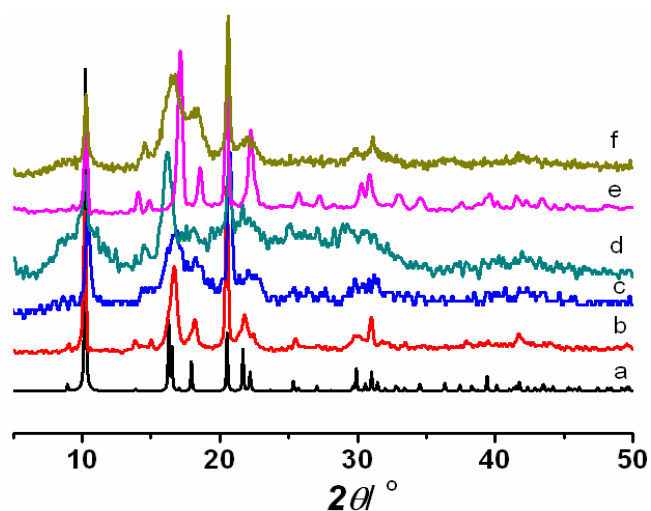

Figure S3. PXRD patterns: a) simulated from the single-crystal data of **1**, b) as-synthesized **1**, c) hollow phase of **1a**, d) MO-loading phase of **1a'**, e) the sample of **1a'** soaked in DMSO and f) the sample of **1a** soaked in water.

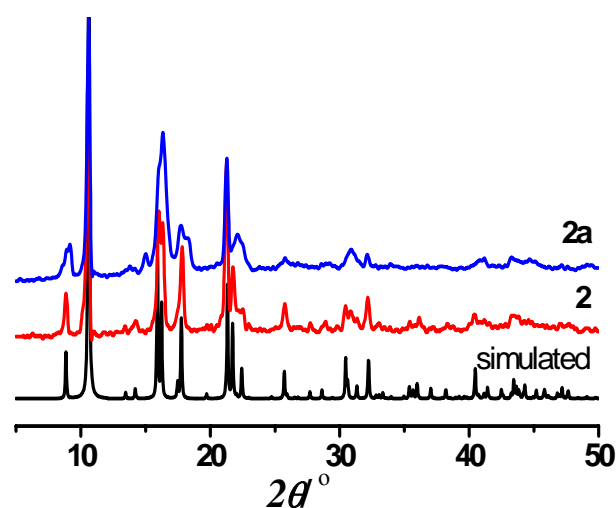

Figure S4. PXRD patterns: simulated from the single-crystal data of **2**, as-synthesized **2**, hollow phase of **2a**.

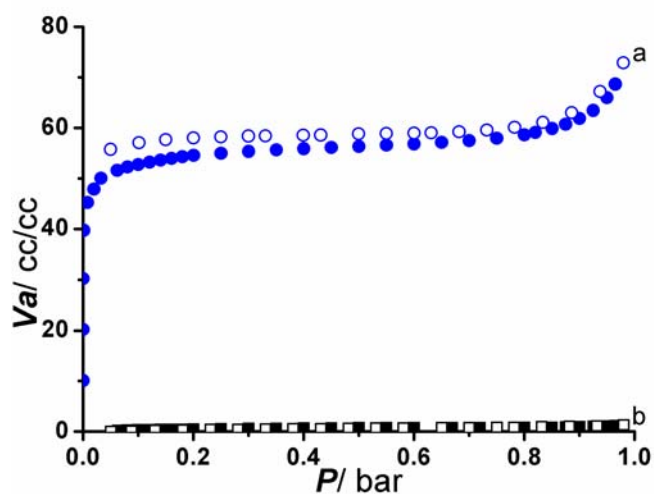

Figure S5.  $N_2$  sorption isotherms at 77 K for **1a** (b) and **2a** (a).

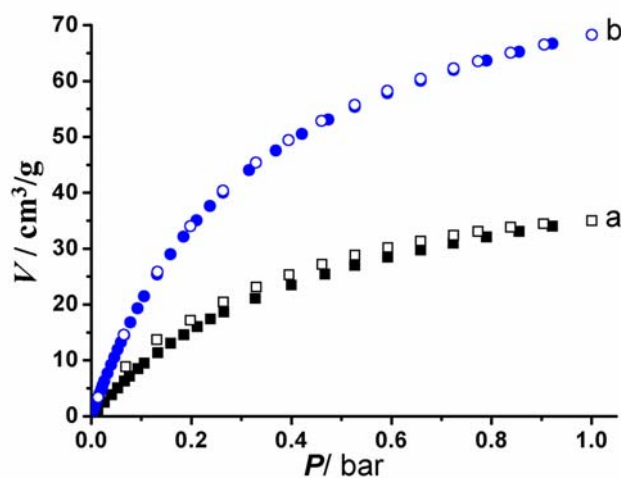

Figure S6.  $CO_2$  sorption isotherms: a)  $CO_2$  at 273 K for **1a**; b)  $CO_2$  at 273 K for **2a**.

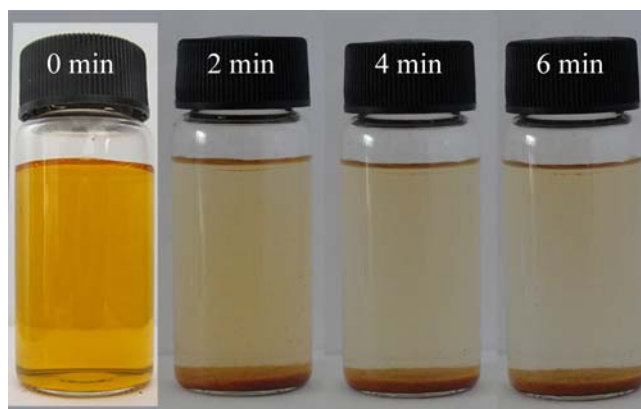

Figure S7. Photos of MO enrichment progress over **2a** in 6 mins.

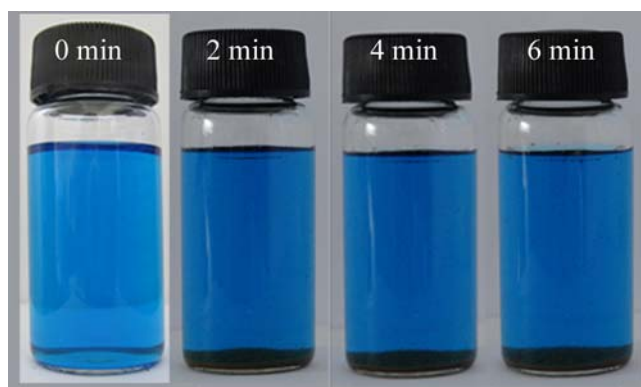

Figure S8. Photos of MB enrichment progress over **2a** in 6 mins.

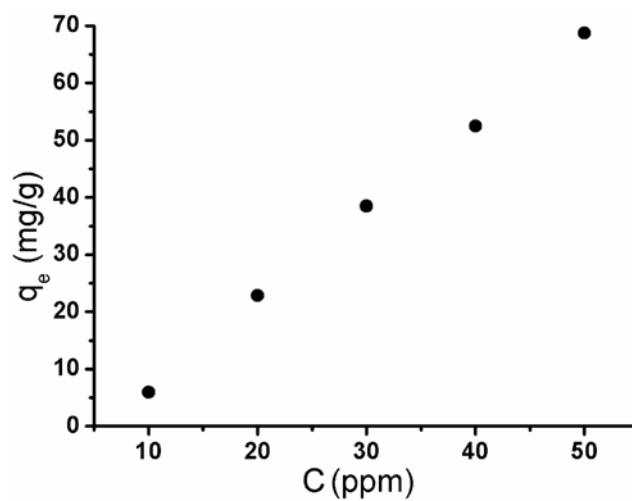

**Figure** S9. Adsorption isotherm for MO adsorption over **1a**.

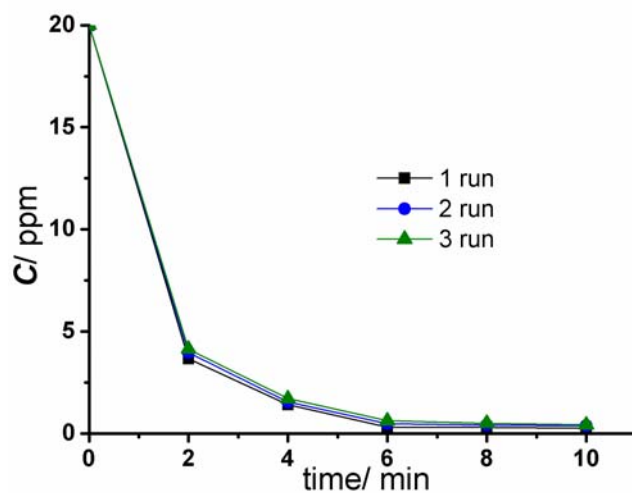

Figure S10. Measured concentration curves of MO enrichment progress over **1a**. A recycling test with three consecutive runs.

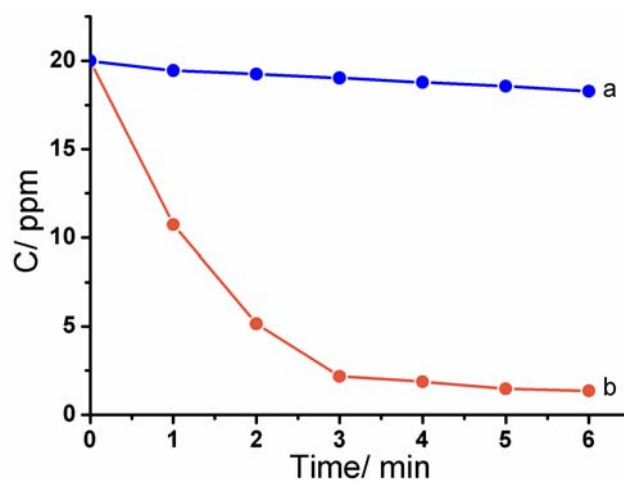

Figure S11. The concentrations of mixed MB (a) and MO (b) in water solution.

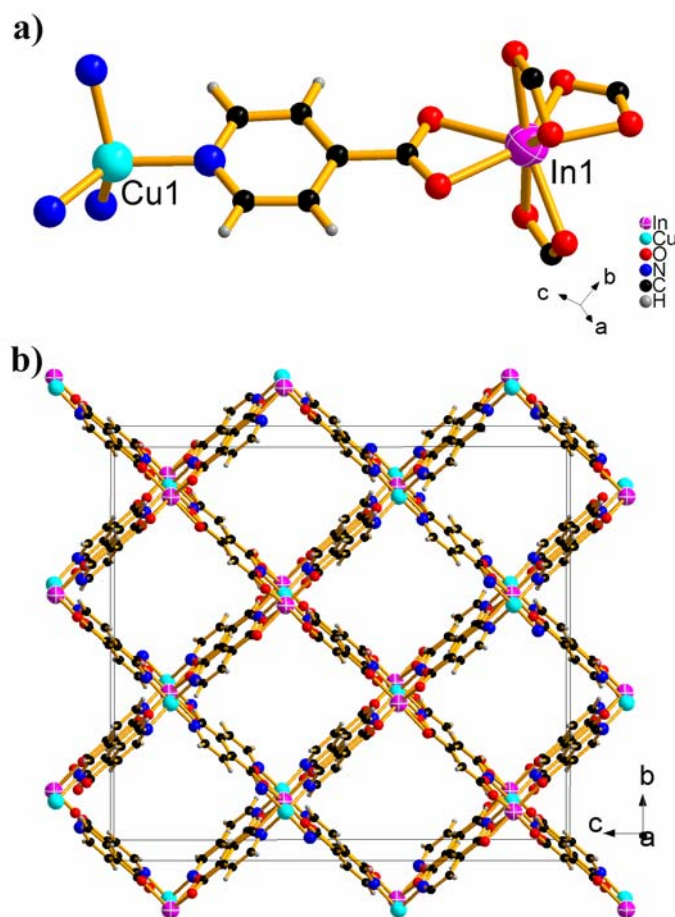

Figure S12. (a) Two tetrahedral building units ( $[\text{CuN}_4]^+$  and  $[\text{In}(\text{COO})_4]^-$ ) linked by the ina ligand in **2**; (b) The 3D framework of **2**.
